# Supplementary material for: Plasma degradome affected by variable storage of human blood
Source: PubMed Central journal article supplement (PMC5037888; doi:10.1186/s12014-016-9126-9), 2016-09-26
Supplement: 12014_2016_9126_MOESM1_ESM.pdf [file 12014_2016_9126_MOESM1_ESM.pdf]

# Plasma Degradome Affected by Variable Storage of Human Blood

Maria Kaiser<sup>1,2,4</sup>, Leon F.A. van Dullemen<sup>3+</sup>, Marie-Laëtitia Thézénas<sup>4+</sup>, M. Zeeshan Akhtar<sup>1</sup>, Honglei Huang<sup>1,4</sup>, Sandrine Rendel<sup>1</sup>, Philip D. Charles<sup>4</sup>, Roman Fischer<sup>4</sup>, Rutger J. Ploeg<sup>1,2§</sup> and Benedikt M. Kessler<sup>4§</sup>

<sup>1</sup> *Nuffield Department of Surgical Sciences, University of Oxford, OX3 7LJ, UK*

<sup>2</sup> *NHS Blood and Transplant, UK*

<sup>3</sup> *Surgical Research Laboratory, University of Groningen, The Netherlands*

<sup>4</sup> *Target Discovery Institute, Nuffield Department of Medicine, University of Oxford, OX3 7FZ, UK*

+Authors have contributed equally

§Authors have contributed equally

Corresponding Author: Benedikt M Kessler  
Target Discovery Institute,  
Nuffield Department of Medicine,  
University of Oxford,  
OX3 7FZ, UK  
Email: Benedikt.Kessler@ndm.ox.ac.uk

## ***Supplemental Data***

**Table S1**

**Figure S1**

**Figure S2**

## Figure Legend

### **Figure S1: *Peptographs of Complement proteins indicating partial degradation as a function of variable blood storage***

Prolonged blood storage provokes partial degradation of complement C5 **(A)** and C2 **(B)** as exemplified by their corresponding peptographs (blue bars – 30 min; red bars – 48 h blood storage at ambient temperature).

### **Figure S2: *Peptographs indicate partial degradation of plasma proteins as a function of variable blood storage***

Prolonged blood storage provokes partial degradation of fibrinogen alpha chain, serpin A4 (corticosteroid-binding globulin), serpin A3 (serum paraoxonase), extracellular matrix protein-1 (EMC1), ceruloplasmin, plasminogen like protein A, serum paraoxonase (PON1), alpha-1 inter alpha trypsin inhibitor (ITIH1), fibronectin and apolipoprotein B-100 as exemplified by their corresponding peptographs (blue bars – 30 min; red bars – 48 h blood storage at ambient temperature).

**Table S1**

| Accession | Description                                                 | Average normalised abundance |                |          |                |          | Fold Change    |       |           |              |            |
|-----------|-------------------------------------------------------------|------------------------------|----------------|----------|----------------|----------|----------------|-------|-----------|--------------|------------|
|           |                                                             | Anova (p)*                   | Centrifugation |          | Centrifugation |          | Centrifugation |       | 8h vs 30m | 24h vs 30min | 48h vs 30m |
|           |                                                             |                              | T=30 min       | T=8h     | T=24h          | T=48h    |                |       |           |              |            |
| Q4G0Z9    | MCM domain-containing protein 2                             | 8.30E-07                     | 205000         | 332000   | 342000         | 347000   | 1.62           | 1.67  | 1.69      |              |            |
| P02768    | Serum albumin                                               | 1.01E-05                     | 10100000       | 17900000 | 19000000       | 18300000 | 1.77           | 1.88  | 1.81      |              |            |
| Q07864    | DNA polymerase epsilon catalytic subunit A                  | 1.28E-05                     | 628000         | 783000   | 780000         | 741000   | 1.25           | 1.24  | 1.18      |              |            |
| P07737    | Profilin-1                                                  | 2.86E-05                     | 12900          | 14300    | 25900          | 92200    | 1.11           | 2.01  | 7.15      |              |            |
| Q96N67    | Dedicator of cytokinesis protein 7                          | 6.08E-04                     | 1030000        | 1530000  | 1530000        | 1430000  | 1.49           | 1.49  | 1.39      |              |            |
| Q96M91    | Coiled-coil domain-containing protein 11                    | 8.62E-04                     | 744000         | 902000   | 974000         | 932000   | 1.21           | 1.31  | 1.25      |              |            |
| POCG06    | Ig lambda-3 chain C regions                                 | 1.25E-03                     | 88300          | 159000   | 166000         | 172000   | 1.80           | 1.88  | 1.95      |              |            |
| P07996    | Thrombospondin-1                                            | 1.41E-03                     | 449000         | 537000   | 601000         | 625000   | 1.20           | 1.34  | 1.39      |              |            |
| P02538    | Keratin, type II cytoskeletal 6A                            | 2.00E-03                     | 900000         | 1100000  | 1130000        | 1120000  | 1.22           | 1.26  | 1.24      |              |            |
| P02746    | Complement C1q subcomponent subunit B                       | 2.50E-03                     | 1660000        | 2160000  | 2140000        | 2110000  | 1.30           | 1.29  | 1.27      |              |            |
| Q535Z7    | Uncharacterized protein C2orf53                             | 2.57E-03                     | 262000         | 480000   | 495000         | 454000   | 1.83           | 1.89  | 1.73      |              |            |
| P01620    | Ig kappa chain V-III region SIE;                            | 8.92E-03                     | 2729.32        | 5438.74  | 5586.37        | 6118.34  | 1.99           | 2.05  | 2.24      |              |            |
| P01857    | Ig gamma-1 chain C region;                                  | 1.00E-02                     | 324000         | 578000   | 596000         | 575000   | 1.78           | 1.84  | 1.77      |              |            |
| P02647    | Apolipoprotein A-I                                          | 2.00E-02                     | 434000         | 553000   | 553000         | 559000   | 1.27           | 1.27  | 1.29      |              |            |
| P01860    | Ig gamma-3 chain C region                                   | 2.00E-02                     | 187000         | 316000   | 322000         | 318000   | 1.69           | 1.72  | 1.70      |              |            |
| P06326    | Ig heavy chain V-I region Mot                               | 2.00E-02                     | 3822.83        | 6588.17  | 7772.15        | 7257.39  | 1.72           | 2.03  | 1.90      |              |            |
| Q6NXT1    | Ankyrin repeat domain-containing protein 54                 | 2.00E-02                     | 57400          | 128000   | 130000         | 124000   | 2.23           | 2.26  | 2.16      |              |            |
| P05160    | Coagulation factor XIII B chain                             | 3.00E-02                     | 965000         | 1200000  | 1180000        | 1170000  | 1.24           | 1.22  | 1.21      |              |            |
| O75019    | Leukocyte immunoglobulin-like receptor subfamily A member 1 | 3.00E-02                     | 54300          | 67700    | 76500          | 73800    | 1.25           | 1.41  | 1.36      |              |            |
| P02679    | Fibrinogen gamma chain                                      | 4.00E-02                     | 1710000        | 2350000  | 2220000        | 2120000  | 1.37           | 1.30  | 1.24      |              |            |
| P01876    | Ig alpha-1 chain C region;                                  | 4.00E-02                     | 34000          | 83100    | 84000          | 78100    | 2.44           | 2.47  | 2.30      |              |            |
| P01034    | Cystatin-C                                                  | 4.00E-02                     | 38600          | 50800    | 49800          | 48900    | 1.32           | 1.29  | 1.27      |              |            |
| P01834    | Ig kappa chain C region;                                    | 5.00E-02                     | 203000         | 412000   | 437000         | 421000   | 2.03           | 2.15  | 2.07      |              |            |
| P11021    | 78 kDa glucose-regulated protein                            | 5.00E-02                     | 1010000        | 1290000  | 1270000        | 1230000  | 1.28           | 1.26  | 1.22      |              |            |
| Q8IUH4    | Palmitoyltransferase ZDHHC13                                | 5.00E-02                     | 1730000        | 1500000  | 1580000        | 1490000  | 0.87           | 0.91  | 0.86      |              |            |
| P01619    | Ig kappa chain V-III region B6                              | 6.00E-02                     | 2022.75        | 3676     | 3845.89        | 4375.64  | 1.82           | 1.90  | 2.16      |              |            |
| P00738    | Haptoglobin                                                 | 8.00E-02                     | 133000         | 209000   | 220000         | 214000   | 1.57           | 1.65  | 1.61      |              |            |
| P02775    | Platelet basic protein                                      | 8.00E-02                     | 199000         | 177000   | 285000         | 322000   | 0.89           | 1.43  | 1.62      |              |            |
| P07951    | Tropomyosin beta chain                                      | 8.00E-02                     | 700000         | 851000   | 940000         | 943000   | 1.22           | 1.34  | 1.35      |              |            |
| P06753    | Tropomyosin alpha-3 chain                                   | 8.00E-02                     | 705000         | 858000   | 938000         | 931000   | 1.22           | 1.33  | 1.32      |              |            |
| P54108    | Cysteine-rich secretory protein 3                           | 9.00E-02                     | 73400          | 95700    | 102000         | 99900    | 1.20           | 1.39  | 1.36      |              |            |
| Q86U86    | Protein polybromo-1;                                        | 1.00E-01                     | 3080000        | 3550000  | 3630000        | 3610000  | 1.15           | 1.18  | 1.17      |              |            |
| P02776    | Platelet factor 4; S                                        | 1.00E-01                     | 8573.19        | 7584.43  | 13700          | 21300    | 0.88           | 1.60  | 2.48      |              |            |
| P31949    | Protein S100-A11                                            | 1.20E-01                     | 14.45          | 0        | 274.09         | 574.75   | 0.00           | 18.97 | 39.78     |              |            |
| P01859    | Ig gamma-2 chain C region;                                  | 1.50E-01                     | 262000         | 405000   | 389000         | 380000   | 1.55           | 1.48  | 1.45      |              |            |
| P06702    | Protein S100-A9                                             | 1.60E-01                     | 17300          | 19100    | 96400          | 136000   | 1.10           | 5.57  | 7.86      |              |            |
| P01861    | Ig gamma-4 chain C region;                                  | 1.70E-01                     | 411000         | 512000   | 544000         | 516000   | 1.25           | 1.32  | 1.26      |              |            |
| P00558    | Phosphoglycerate kinase 1                                   | 1.70E-01                     | 3400000        | 3070000  | 3190000        | 3090000  | 0.90           | 0.94  | 0.89      |              |            |
| Q16322    | Potassium voltage-gated channel subfamily A member 10       | 1.70E-01                     | 132000         | 103000   | 97800          | 99300    | 0.78           | 0.74  | 0.75      |              |            |
| P00736    | Complement C1r subcomponent                                 | 1.80E-01                     | 3060000        | 2740000  | 2790000        | 2610000  | 0.90           | 0.91  | 0.85      |              |            |
| O15481    | Melanoma-associated antigen B4                              | 2.00E-01                     | 822000         | 712000   | 765000         | 741000   | 0.87           | 0.93  | 0.90      |              |            |
| Q8IWN7    | Retinitis pigmentosa 1-like 1 protein;                      | 2.30E-01                     | 1750000        | 1900000  | 2020000        | 1990000  | 1.09           | 1.15  | 1.14      |              |            |
| Q14532    | Keratin, type I cuticular Ha2                               | 2.30E-01                     | 1500000        | 1560000  | 1760000        | 1780000  | 1.04           | 1.17  | 1.19      |              |            |
| Q12860    | Contactin-1; AltName                                        | 2.30E-01                     | 68700          | 56200    | 66100          | 65500    | 0.82           | 0.96  | 0.95      |              |            |
| P01009    | Alpha-1-antitrypsin                                         | 2.40E-01                     | 387000         | 405000   | 436000         | 413000   | 1.05           | 1.13  | 1.07      |              |            |
| O75882    | Attractin                                                   | 2.70E-01                     | 995000         | 896000   | 843000         | 825000   | 0.90           | 0.85  | 0.83      |              |            |
| P03951    | Coagulation factor XI                                       | 3.00E-01                     | 433000         | 392000   | 406000         | 402000   | 0.91           | 0.94  | 0.93      |              |            |
| P05109    | Protein S100-A8                                             | 3.00E-01                     | 34700          | 31400    | 57700          | 80800    | 0.90           | 1.66  | 2.33      |              |            |
| Q5T013    | Putative hydroxypyruvate isomerase                          | 3.00E-01                     | 1090000        | 1260000  | 1140000        | 1120000  | 1.16           | 1.05  | 1.03      |              |            |
| P14618    | Pyruvate kinase PKM                                         | 3.00E-01                     | 342000         | 304000   | 317000         | 324000   | 0.89           | 0.93  | 0.95      |              |            |
| P35908    | Keratin, type II cytoskeletal 2 epidermal                   | 3.10E-01                     | 565000         | 495000   | 498000         | 474000   | 0.88           | 0.88  | 0.84      |              |            |
| P00915    | Carbonic anhydrase 1                                        | 3.40E-01                     | 1670000        | 1900000  | 1840000        | 1750000  | 1.14           | 1.10  | 1.05      |              |            |
| Q6TDU7    | Protein CASC1                                               | 3.80E-01                     | 706000         | 644000   | 610000         | 558000   | 0.91           | 0.86  | 0.79      |              |            |
| Q02985    | Complement factor H-related protein 3                       | 4.10E-01                     | 519000         | 508000   | 460000         | 459000   | 0.98           | 0.89  | 0.88      |              |            |
| P50406    | 5-hydroxytryptamine receptor 6                              | 4.10E-01                     | 139000         | 142000   | 117000         | 112000   | 1.02           | 0.84  | 0.81      |              |            |
| Q8IXR9    | Uncharacterized protein C12orf56                            | 4.30E-01                     | 982000         | 1110000  | 1130000        | 1020000  | 1.13           | 1.15  | 1.04      |              |            |
| P25815    | Protein S100-P                                              | 4.50E-01                     | 10300          | 10500    | 13100          | 13600    | 1.02           | 1.27  | 1.32      |              |            |
| P02787    | Serotransferrin                                             | 4.60E-01                     | 854000         | 963000   | 973000         | 922000   | 1.13           | 1.14  | 1.08      |              |            |
| Q9NQ79    | Cartilage acidic protein 1                                  | 4.60E-01                     | 13500          | 12100    | 15600          | 15600    | 0.90           | 1.16  | 1.16      |              |            |
| Q13103    | Secreted phosphoprotein 24                                  | 4.70E-01                     | 147000         | 132000   | 118000         | 111000   | 0.90           | 0.80  | 0.76      |              |            |
| Q14168    | MAGUK p55 subfamily member 2                                | 4.70E-01                     | 610000         | 648000   | 662000         | 665000   | 1.06           | 1.09  | 1.09      |              |            |
| Q9H939    | Proline-serine-threonine phosphatase-interacting protein 2  | 4.70E-01                     | 1290000        | 1210000  | 1350000        | 1350000  | 0.94           | 1.05  | 1.05      |              |            |
| Q9NQ10    | Probable ATP-dependent RNA helicase DDX4                    | 4.70E-01                     | 926000         | 1060000  | 1010000        | 903000   | 1.14           | 1.09  | 0.98      |              |            |
| Q9NR34    | Mannosyl-oligosaccharide 1,2-alpha-mannosidase IC           | 4.70E-01                     | 103000         | 85900    | 105000         | 102000   | 0.83           | 1.02  | 0.99      |              |            |
| Q04756    | Hepatocyte growth factor activator                          | 4.80E-01                     | 1070000        | 939000   | 1020000        | 998000   | 0.88           | 0.95  | 0.93      |              |            |
| P15923    | Transcription factor E2-alpha                               | 4.80E-01                     | 738000         | 851000   | 797000         | 697000   | 1.15           | 1.08  | 0.94      |              |            |
| P06396    | Gelsolin                                                    | 4.90E-01                     | 1050000        | 965000   | 1010000        | 996000   | 0.92           | 0.96  | 0.95      |              |            |
| Q9Y490    | Talin-1                                                     | 4.90E-01                     | 5690000        | 5240000  | 5300000        | 5340000  | 0.92           | 0.93  | 0.94      |              |            |
| Q6YHU6    | Thyroid adenoma-associated protein                          | 4.90E-01                     | 4720000        | 4840000  | 5220000        | 5140000  | 1.03           | 1.11  | 1.09      |              |            |
| Q6UVK1    | Chondroitin sulfate proteoglycan 4                          | 4.90E-01                     | 1710000        | 1650000  | 1720000        | 1600000  | 0.96           | 1.01  | 0.94      |              |            |
| P17936    | Insulin-like growth factor-binding protein 3                | 5.00E-01                     | 143000         | 125000   | 136000         | 131000   | 0.87           | 0.95  | 0.92      |              |            |
| Q5V2M2    | Ras-related GTP-binding protein B                           | 5.00E-01                     | 374000         | 313000   | 370000         | 353000   | 0.84           | 0.99  | 0.94      |              |            |
| P02654    | Apolipoprotein C-I                                          | 5.20E-01                     | 286000         | 234000   | 243000         | 326000   | 0.82           | 0.85  | 1.14      |              |            |
| P48741    | Putative heat shock 70 kDa protein 7                        | 5.20E-01                     | 999000         | 915000   | 925000         | 898000   | 0.92           | 0.93  | 0.90      |              |            |
| P02753    | Retinol-binding protein 4                                   | 5.30E-01                     | 2800000        | 3030000  | 3330000        | 2780000  | 1.08           | 1.19  | 0.99      |              |            |
| P00746    | Complement factor D                                         | 5.30E-01                     | 57500          | 50900    | 53900          | 56100    | 0.89           | 0.94  | 0.98      |              |            |
| P23142    | Fibulin-1                                                   | 5.40E-01                     | 689000         | 632000   | 710000         | 736000   | 0.92           | 1.03  | 1.07      |              |            |

|        |                                                                     |          |          |          |          |          |      |       |      |
|--------|---------------------------------------------------------------------|----------|----------|----------|----------|----------|------|-------|------|
| Q8IZJ4 | Ral-GDS-related protein                                             | 5.40E-01 | 608000   | 484000   | 546000   | 613000   | 0.80 | 0.90  | 1.01 |
| P12259 | Coagulation factor V                                                | 5.60E-01 | 7530000  | 6920000  | 7020000  | 6750000  | 0.92 | 0.93  | 0.90 |
| Q9Y2V7 | Conserved oligomeric Golgi complex subunit 6                        | 5.60E-01 | 930000   | 844000   | 872000   | 834000   | 0.91 | 0.94  | 0.90 |
| P61626 | Lysozyme C                                                          | 5.70E-01 | 106000   | 98000    | 94800    | 106000   | 0.92 | 0.89  | 1.00 |
| P55056 | Apolipoprotein C-IV                                                 | 5.70E-01 | 57000    | 51700    | 51200    | 50200    | 0.91 | 0.90  | 0.88 |
| Q9Y2K3 | Myosin-15                                                           | 5.80E-01 | 6180000  | 5810000  | 5860000  | 5740000  | 0.94 | 0.95  | 0.93 |
| PODIJ8 | Serum amyloid A-1 protein                                           | 5.80E-01 | 4916.99  | 6706.49  | 9214.87  | 14700    | 1.36 | 1.87  | 2.99 |
| P63104 | 14-3-3 protein zeta/delta                                           | 5.80E-01 | 101000   | 86700    | 81600    | 90600    | 0.86 | 0.81  | 0.90 |
| Q6ZTQ3 | Ras association domain-containing protein 6                         | 5.80E-01 | 2230000  | 2070000  | 2290000  | 2110000  | 0.93 | 1.03  | 0.95 |
| P04220 | Ig mu heavy chain disease protein                                   | 5.90E-01 | 33500    | 51000    | 48500    | 45500    | 1.52 | 1.45  | 1.36 |
| O94901 | SUN domain-containing protein 1                                     | 5.90E-01 | 5210000  | 4930000  | 4750000  | 4680000  | 0.95 | 0.91  | 0.90 |
| Q03591 | Complement factor H-related protein 1                               | 6.00E-01 | 2340000  | 2150000  | 2150000  | 2200000  | 0.92 | 0.92  | 0.94 |
| Q9H8V3 | Protein ECT2                                                        | 6.00E-01 | 1820000  | 1670000  | 1610000  | 1610000  | 0.92 | 0.88  | 0.88 |
| P02790 | Hemopexin                                                           | 6.10E-01 | 50200000 | 47300000 | 48100000 | 46600000 | 0.94 | 0.96  | 0.93 |
| P37802 | Transgelin-2                                                        | 6.10E-01 | 2380000  | 2590000  | 2610000  | 2480000  | 1.09 | 1.10  | 1.04 |
| P23528 | Cofilin-1                                                           | 6.10E-01 | 266000   | 238000   | 247000   | 260000   | 0.89 | 0.93  | 0.98 |
| P00338 | L-lactate dehydrogenase A chain                                     | 6.10E-01 | 1230000  | 1110000  | 1100000  | 1070000  | 0.90 | 0.89  | 0.87 |
| Q8IZF0 | Sodium leak channel non-selective protein                           | 6.20E-01 | 1150000  | 1070000  | 1080000  | 1060000  | 0.93 | 0.94  | 0.92 |
| O75626 | PR domain zinc finger protein 1                                     | 6.20E-01 | 477000   | 398000   | 390000   | 381000   | 0.83 | 0.82  | 0.80 |
| P02649 | Apolipoprotein E                                                    | 6.30E-01 | 3660000  | 3560000  | 3590000  | 3390000  | 0.97 | 0.98  | 0.91 |
| Q15195 | Plasminogen-like protein A                                          | 6.30E-01 | 238000   | 214000   | 226000   | 225000   | 0.90 | 0.95  | 0.95 |
| Q96PV7 | Protein FAM193B                                                     | 6.30E-01 | 283000   | 240000   | 257000   | 276000   | 0.85 | 0.91  | 0.98 |
| Q9BYX7 | Putative beta-actin-like protein 3                                  | 6.40E-01 | 464000   | 411000   | 426000   | 462000   | 0.89 | 0.92  | 1.00 |
| P02766 | Transthyretin                                                       | 6.50E-01 | 110000   | 125000   | 120000   | 96800    | 1.14 | 1.09  | 0.88 |
| P07195 | L-lactate dehydrogenase B chain                                     | 6.50E-01 | 211000   | 197000   | 205000   | 218000   | 0.93 | 21.00 | 1.03 |
| P02745 | Complement C1q subcomponent subunit A                               | 6.60E-01 | 719000   | 808000   | 769000   | 744000   | 1.12 | 1.07  | 1.03 |
| O00391 | Sulfhydryl oxidase 1                                                | 6.60E-01 | 4450000  | 4070000  | 3970000  | 3860000  | 0.91 | 0.89  | 0.87 |
| Q8WVM7 | Cohesin subunit SA-1                                                | 6.60E-01 | 2500000  | 2250000  | 2330000  | 2430000  | 0.90 | 0.93  | 0.97 |
| P04217 | Alpha-1B-glycoprotein                                               | 6.70E-01 | 9040000  | 8660000  | 8780000  | 8380000  | 0.96 | 0.97  | 0.93 |
| P05154 | Plasma serine protease inhibitor                                    | 6.70E-01 | 138000   | 115000   | 122000   | 152000   | 0.83 | 0.88  | 1.10 |
| P00742 | Coagulation factor X                                                | 6.70E-01 | 946000   | 1030000  | 992000   | 953000   | 1.09 | 1.05  | 1.01 |
| P43121 | Cell surface glycoprotein MUC18                                     | 6.70E-01 | 3310000  | 2870000  | 3070000  | 3010000  | 0.87 | 0.93  | 0.91 |
| Q96CF2 | Charged multivesicular body protein 4c                              | 6.70E-01 | 375000   | 361000   | 359000   | 335000   | 0.96 | 0.96  | 0.89 |
| P02765 | Alpha-2-HS-glycoprotein                                             | 6.80E-01 | 24200000 | 22200000 | 23300000 | 22000000 | 0.92 | 0.96  | 0.91 |
| Q04695 | Keratin, type I cytoskeletal 17                                     | 6.80E-01 | 1760000  | 1590000  | 1770000  | 1620000  | 0.90 | 1.01  | 0.92 |
| Q9YSY7 | Lymphatic vessel endothelial hyaluronin acid receptor 1; Short-LYV6 | 6.80E-01 | 6220000  | 6560000  | 6680000  | 6820000  | 1.05 | 1.07  | 1.10 |
| P01011 | Alpha-1-antichymotrypsin                                            | 6.90E-01 | 10600000 | 10200000 | 10100000 | 9790000  | 0.96 | 0.95  | 0.92 |
| Q9UK55 | Protein Z-dependent protease inhibitor                              | 6.90E-01 | 6220000  | 6560000  | 6670000  | 6810000  | 1.05 | 1.07  | 1.09 |
| P01877 | Ig alpha-2 chain C region                                           | 6.90E-01 | 200000   | 227000   | 230000   | 224000   | 1.14 | 1.15  | 1.12 |
| P02763 | Alpha-1-acid glycoprotein 1                                         | 6.90E-01 | 110000   | 136000   | 111000   | 105000   | 1.24 | 1.01  | 0.95 |
| P19652 | Alpha-1-acid glycoprotein 2                                         | 6.90E-01 | 115000   | 146000   | 123000   | 115000   | 1.27 | 1.07  | 1.00 |
| Q96AY3 | Peptidyl-prolyl cis-trans isomerase FKBP10                          | 6.90E-01 | 420000   | 407000   | 388000   | 357000   | 0.97 | 0.92  | 0.85 |
| P07360 | Complement component C8 gamma chain                                 | 7.00E-01 | 839000   | 761000   | 801000   | 773000   | 0.91 | 0.95  | 0.92 |
| Q9Y4G6 | Talin-2                                                             | 7.00E-01 | 4250000  | 3840000  | 4050000  | 4060000  | 0.90 | 0.95  | 0.96 |
| Q385D2 | Leucine-rich repeat serine/threonine-protein kinase 1               | 7.00E-01 | 4570000  | 4160000  | 4070000  | 3970000  | 0.91 | 0.89  | 0.87 |
| Q15166 | Serum paraoxonase/lactonase 3                                       | 7.00E-01 | 183000   | 193000   | 195000   | 206000   | 1.05 | 1.07  | 1.13 |
| P04040 | Catalase                                                            | 7.00E-01 | 3170000  | 2950000  | 3060000  | 2930000  | 0.93 | 0.97  | 0.92 |
| Q8IYB4 | PEX5-related protein                                                | 7.00E-01 | 1320000  | 1320000  | 1430000  | 1480000  | 1.00 | 1.08  | 1.12 |
| O75636 | Ficolin-3                                                           | 7.10E-01 | 382000   | 326000   | 340000   | 349000   | 0.85 | 0.89  | 0.91 |
| Q92954 | Proteoglycan 4                                                      | 7.10E-01 | 5420000  | 5080000  | 5220000  | 4960000  | 0.94 | 0.96  | 0.92 |
| Q92817 | Envoplakin                                                          | 7.10E-01 | 7280000  | 7300000  | 7250000  | 6900000  | 1.00 | 1.00  | 0.95 |
| Q00610 | Clathrin heavy chain 1                                              | 7.10E-01 | 4530000  | 4430000  | 4290000  | 4180000  | 0.98 | 0.95  | 0.92 |
| P02751 | Fibronectin                                                         | 7.20E-01 | 515000   | 474000   | 495000   | 474000   | 0.92 | 0.96  | 0.92 |
| P04264 | Keratin, type II cytoskeletal 1                                     | 7.20E-01 | 524000   | 489000   | 493000   | 443000   | 0.93 | 0.94  | 0.85 |
| P36980 | Complement factor H-related protein 2                               | 7.20E-01 | 1100000  | 974000   | 1010000  | 1020000  | 0.89 | 0.92  | 0.93 |
| O60524 | Nuclear export mediator factor NEMF                                 | 7.20E-01 | 2420000  | 2090000  | 2350000  | 2390000  | 0.86 | 0.97  | 0.99 |
| P57103 | Sodium/calcium exchanger 3                                          | 7.20E-01 | 793000   | 737000   | 685000   | 716000   | 0.93 | 0.86  | 0.90 |
| P20366 | Protachykinin-1                                                     | 7.20E-01 | 61900    | 52700    | 56300    | 55600    | 0.85 | 0.91  | 0.90 |
| P09172 | Dopamine beta-hydroxylase                                           | 7.30E-01 | 318000   | 290000   | 291000   | 313000   | 0.91 | 0.92  | 0.98 |
| P04259 | Keratin, type II cytoskeletal 6B                                    | 7.30E-01 | 1250000  | 1310000  | 1210000  | 1270000  | 1.05 | 0.97  | 1.02 |
| P08709 | Coagulation factor VII                                              | 7.30E-01 | 423000   | 405000   | 367000   | 366000   | 0.96 | 0.87  | 0.87 |
| Q6ZN30 | Zinc finger protein basonuclin-2                                    | 7.30E-01 | 1460000  | 1320000  | 1390000  | 1310000  | 0.90 | 0.95  | 0.90 |
| Q6P9F7 | Leucine-rich repeat-containing protein 8B                           | 7.30E-01 | 307000   | 302000   | 293000   | 286000   | 0.98 | 0.95  | 0.93 |
| P27487 | Dipeptidyl peptidase 4                                              | 7.30E-01 | 1180000  | 1080000  | 1100000  | 1150000  | 0.92 | 0.93  | 0.97 |
| Q9YSZ7 | Host cell factor 2                                                  | 7.40E-01 | 993000   | 1020000  | 1100000  | 1010000  | 1.03 | 1.11  | 1.02 |
| P20929 | Nebulin                                                             | 7.50E-01 | 31900000 | 30500000 | 30700000 | 29700000 | 0.96 | 0.96  | 0.93 |
| P02656 | Apolipoprotein C-III                                                | 7.50E-01 | 1070000  | 989000   | 954000   | 1120000  | 0.92 | 0.89  | 1.05 |
| PODIJ9 | Serum amyloid A-2 protein                                           | 7.50E-01 | 43400    | 40700    | 39700    | 45200    | 0.94 | 0.91  | 1.04 |
| Q9Y6K5 | 2'-5'-oligoadenylate synthase 3                                     | 7.50E-01 | 511000   | 508000   | 521000   | 549000   | 0.99 | 1.02  | 1.07 |
| Q7Z3V7 | Keratin, type I cytoskeletal 28                                     | 7.50E-01 | 2070000  | 2000000  | 1990000  | 1910000  | 0.97 | 0.96  | 0.92 |
| Q9UHC7 | E3 ubiquitin-protein ligase makorin-1                               | 7.50E-01 | 526000   | 475000   | 539000   | 509000   | 0.90 | 1.02  | 0.97 |
| Q92769 | Histone deacetylase 2                                               | 7.50E-01 | 2200000  | 2020000  | 1930000  | 1890000  | 0.92 | 0.88  | 0.86 |
| P09871 | Complement C1s subcomponent                                         | 7.60E-01 | 2950000  | 2690000  | 2880000  | 2820000  | 0.91 | 0.98  | 0.96 |
| P26927 | Hepatocyte growth factor-like protein                               | 7.60E-01 | 924000   | 842000   | 851000   | 827000   | 0.91 | 0.92  | 0.90 |
| P15169 | Carboxypeptidase N catalytic chain                                  | 7.60E-01 | 2140000  | 1790000  | 1980000  | 1980000  | 0.84 | 0.93  | 0.93 |
| Q92820 | Gamma-glutamyl hydrolase                                            | 7.60E-01 | 1240000  | 1260000  | 1310000  | 1200000  | 1.02 | 1.06  | 0.97 |
| Q14515 | SPARC-like protein 1                                                | 7.60E-01 | 787000   | 881000   | 783000   | 772000   | 1.12 | 0.99  | 0.98 |
| Q9UNP4 | Lactosylceramide alpha-2,3-sialyltransferase                        | 7.60E-01 | 11000    | 9538.5   | 9976.91  | 10000    | 0.87 | 0.91  | 0.91 |
| P68032 | Actin, alpha cardiac muscle 1                                       | 7.70E-01 | 534000   | 493000   | 485000   | 564000   | 0.92 | 0.91  | 1.06 |
| Q8NDH2 | Coiled-coil domain-containing protein 168                           | 7.70E-01 | 10600000 | 10300000 | 10100000 | 9960000  | 0.97 | 0.95  | 0.94 |

|         |                                                                  |          |          |          |          |          |      |      |      |
|---------|------------------------------------------------------------------|----------|----------|----------|----------|----------|------|------|------|
| A8MT79  | Putative zinc-alpha-2-glycoprotein-like 1                        | 7.70E-01 | 701000   | 636000   | 680000   | 661000   | 0.91 | 0.97 | 0.94 |
| P08107  | Heat shock 70 kDa protein 1A/1B                                  | 7.70E-01 | 1720000  | 1780000  | 1910000  | 1750000  | 1.03 | 1.11 | 1.02 |
| O15014  | Zinc finger protein 609                                          | 7.70E-01 | 1400000  | 1370000  | 1340000  | 1310000  | 0.98 | 0.96 | 0.94 |
| P19823  | Inter-alpha-trypsin inhibitor heavy chain H2                     | 7.80E-01 | 16800000 | 15200000 | 16300000 | 15600000 | 0.90 | 0.97 | 0.93 |
| Q9NZP8  | Complement C1r subcomponent-like protein                         | 7.80E-01 | 180000   | 157000   | 171000   | 158000   | 0.87 | 0.95 | 0.88 |
| O14791  | Apolipoprotein L1                                                | 7.80E-01 | 258000   | 247000   | 245000   | 247000   | 0.96 | 0.95 | 0.96 |
| Q9Y2I6  | Ninein-like protein                                              | 7.80E-01 | 1270000  | 1200000  | 1280000  | 1260000  | 0.94 | 1.01 | 0.99 |
| Q9H330  | Transmembrane protein 245                                        | 7.80E-01 | 620000   | 622000   | 603000   | 574000   | 1.00 | 0.97 | 0.93 |
| P26599  | Polypyrimidine tract-binding protein 1                           | 7.80E-01 | 491000   | 468000   | 471000   | 451000   | 0.95 | 0.96 | 0.92 |
| P01008  | Antithrombin-III                                                 | 7.90E-01 | 13200000 | 12300000 | 12600000 | 12300000 | 0.93 | 0.95 | 0.93 |
| Q12805  | EGF-containing fibulin-like extracellular matrix protein 1       | 7.90E-01 | 218000   | 218000   | 235000   | 221000   | 1.00 | 1.08 | 1.01 |
| Q2TV78  | Putative macrophage stimulating 1-like protein                   | 7.90E-01 | 211000   | 202000   | 197000   | 189000   | 0.96 | 0.93 | 0.90 |
| P31146  | Coronin-1A                                                       | 7.90E-01 | 1090000  | 970000   | 1070000  | 1110000  | 0.89 | 0.98 | 1.02 |
| P05019  | Insulin-like growth factor II                                    | 7.90E-01 | 468000   | 438000   | 444000   | 436000   | 0.94 | 0.95 | 0.93 |
| Q9BYJ9  | YTH domain family protein 1                                      | 7.90E-01 | 2020000  | 1870000  | 1860000  | 1830000  | 0.93 | 0.92 | 0.91 |
| P0C0L5  | Complement C4-B                                                  | 8.00E-01 | 27100000 | 26600000 | 25500000 | 24600000 | 0.98 | 0.94 | 0.91 |
| P02760  | Protein AMBP                                                     | 8.00E-01 | 3700000  | 3410000  | 3550000  | 3460000  | 0.92 | 0.96 | 0.94 |
| P04004  | Vitronectin                                                      | 8.00E-01 | 8040000  | 7730000  | 7800000  | 7540000  | 0.96 | 0.97 | 0.94 |
| P01766  | Ig heavy chain V-III region BRO;                                 | 8.00E-01 | 367000   | 393000   | 392000   | 368000   | 1.07 | 1.07 | 1.00 |
| Q8IZF3  | Probable G-protein coupled receptor 115                          | 8.00E-01 | 1010000  | 987000   | 939000   | 941000   | 0.98 | 0.93 | 0.93 |
| P22314  | Ubiquitin-like modifier-activating enzyme 1                      | 8.00E-01 | 550000   | 569000   | 542000   | 526000   | 1.03 | 0.99 | 0.96 |
| P0C0L4  | Complement C4-A                                                  | 8.10E-01 | 26700000 | 26200000 | 25200000 | 24300000 | 0.98 | 0.94 | 0.91 |
| P04003  | C4b-binding protein alpha chain                                  | 8.10E-01 | 459000   | 403000   | 387000   | 465000   | 0.88 | 0.84 | 1.01 |
| Q9BXR6  | Complement factor H-related protein 5                            | 8.10E-01 | 956000   | 958000   | 932000   | 877000   | 1.00 | 0.97 | 0.92 |
| P01871  | Ig mu chain C region                                             | 8.10E-01 | 425000   | 353000   | 385000   | 399000   | 0.83 | 0.91 | 0.94 |
| Q8NI35  | InaD-like protein                                                | 8.10E-01 | 2920000  | 2880000  | 2920000  | 3090000  | 0.99 | 1.00 | 1.06 |
| Q01518  | Adenylyl cyclase-associated protein 1                            | 8.10E-01 | 1520000  | 1570000  | 1510000  | 1450000  | 1.03 | 0.99 | 0.95 |
| P49746  | Thrombospondin-3                                                 | 8.10E-01 | 2020000  | 2050000  | 2110000  | 2010000  | 1.01 | 1.04 | 1.00 |
| P02671  | Fibrinogen alpha chain                                           | 8.20E-01 | 2850000  | 2830000  | 2950000  | 3010000  | 0.99 | 1.04 | 1.06 |
| P27169  | Serum paraoxonase/arylesterase 1                                 | 8.20E-01 | 1130000  | 1230000  | 1250000  | 1270000  | 1.09 | 1.11 | 1.12 |
| P61769  | Beta-2-microglobulin                                             | 8.20E-01 | 102000   | 97500    | 107000   | 103000   | 0.96 | 1.05 | 1.01 |
| O60287  | Nucleolar pre-ribosomal-associated protein 1                     | 8.20E-01 | 415000   | 425000   | 443000   | 436000   | 1.02 | 1.07 | 1.05 |
| P62937  | Peptidyl-prolyl cis-trans isomerase A                            | 8.20E-01 | 158000   | 148000   | 166000   | 164000   | 0.94 | 1.05 | 1.04 |
| Q70253  | Protein FRA10A C1                                                | 8.20E-01 | 98300    | 80000    | 93300    | 97100    | 0.81 | 0.95 | 0.99 |
| Q562R1  | Beta-actin-like protein 2                                        | 8.30E-01 | 277000   | 256000   | 255000   | 303000   | 0.92 | 0.92 | 1.09 |
| Q03164  | Histone-lysine N-methyltransferase 2A                            | 8.30E-01 | 4130000  | 3960000  | 3950000  | 3940000  | 0.96 | 0.96 | 0.95 |
| P14151  | L-selectin                                                       | 8.30E-01 | 193000   | 181000   | 168000   | 174000   | 0.94 | 0.87 | 0.90 |
| Q9BYU1  | Pre-B-cell leukemia transcription factor 4                       | 8.30E-01 | 4450000  | 4280000  | 4140000  | 4020000  | 0.96 | 0.93 | 0.90 |
| B5MNCN3 | Putative SEC14-like protein 6                                    | 8.30E-01 | 1960000  | 1810000  | 1840000  | 1890000  | 0.92 | 0.94 | 0.96 |
| Q99542  | Matrix metalloproteinase-19                                      | 8.30E-01 | 683000   | 626000   | 665000   | 657000   | 0.92 | 0.97 | 0.96 |
| Q9HC29  | Nucleotide-binding oligomerization domain-containing protein 2   | 8.30E-01 | 1360000  | 1480000  | 1410000  | 1470000  | 1.09 | 1.04 | 1.08 |
| O43692  | Peptidase inhibitor 15                                           | 8.30E-01 | 48100    | 41800    | 45000    | 48200    | 0.87 | 0.94 | 1.00 |
| Q55Y80  | FERM and PDZ domain-containing protein 1                         | 8.40E-01 | 1170000  | 1220000  | 1150000  | 1150000  | 1.04 | 0.98 | 0.98 |
| P0C091  | FRAS1-related extracellular matrix protein 3                     | 8.40E-01 | 4320000  | 4320000  | 4380000  | 4060000  | 1.00 | 1.01 | 0.94 |
| P17014  | Zinc finger protein 12                                           | 8.40E-01 | 348000   | 382000   | 382000   | 391000   | 1.10 | 1.10 | 1.12 |
| Q6D088  | Atlastin-3                                                       | 8.40E-01 | 1020000  | 954000   | 945000   | 964000   | 0.94 | 0.93 | 0.95 |
| AS5YK6  | CCR4-NOT transcription complex subunit 1                         | 8.50E-01 | 7660000  | 7940000  | 8050000  | 8170000  | 1.04 | 1.05 | 1.07 |
| Q8WXW3  | Progesterone-induced-blocking factor 1                           | 8.50E-01 | 2020000  | 1910000  | 2010000  | 1960000  | 0.95 | 1.00 | 0.97 |
| Q92905  | COP9 signalosome complex subunit 5                               | 8.50E-01 | 972000   | 967000   | 962000   | 901000   | 0.99 | 0.99 | 0.93 |
| Q9H4L7  | SWI/SNF-related matrix-associated actin-dependent regulator of c | 8.50E-01 | 1360000  | 1300000  | 1310000  | 1350000  | 0.96 | 0.96 | 0.99 |
| O94760  | N(G),N(G)-dimethylarginine dimethylaminohydrolase 1              | 8.50E-01 | 4860000  | 4630000  | 4550000  | 4450000  | 0.95 | 0.94 | 0.92 |
| Q9Y5K1  | Meiotic recombination protein SPO11                              | 8.50E-01 | 5150000  | 4890000  | 5180000  | 4950000  | 0.95 | 1.01 | 0.96 |
| P29622  | Kallistatin                                                      | 8.60E-01 | 749000   | 701000   | 712000   | 700000   | 0.94 | 0.95 | 0.93 |
| P18428  | Lipopolysaccharide-binding protein                               | 8.60E-01 | 132000   | 111000   | 121000   | 125000   | 0.84 | 1.02 | 0.95 |
| O43866  | CD5 antigen-like                                                 | 8.60E-01 | 1980000  | 2110000  | 2010000  | 1850000  | 1.07 | 1.02 | 0.93 |
| P04406  | Glyceroldehyde-3-phosphate dehydrogenase                         | 8.60E-01 | 52600    | 48500    | 49200    | 55400    | 0.92 | 0.94 | 1.05 |
| Q9UL68  | Myelin transcription factor 1-like protein                       | 8.60E-01 | 6400000  | 6490000  | 6640000  | 6630000  | 1.01 | 1.04 | 1.04 |
| O95445  | Apolipoprotein M                                                 | 8.60E-01 | 147000   | 137000   | 143000   | 155000   | 0.93 | 0.97 | 1.05 |
| P35900  | Keratin, type I cytoskeletal 20                                  | 8.60E-01 | 609000   | 600000   | 588000   | 599000   | 0.99 | 0.97 | 0.98 |
| Q6ZNI1  | Neurobeachin-like protein 2                                      | 8.60E-01 | 1730000  | 1650000  | 1660000  | 1640000  | 0.95 | 0.96 | 0.95 |
| A8MW99  | Meiosis-specific protein MEI4-like                               | 8.60E-01 | 2730000  | 2660000  | 2630000  | 2530000  | 0.97 | 0.96 | 0.93 |
| P00748  | Coagulation factor XII                                           | 8.70E-01 | 1900000  | 1670000  | 1760000  | 1710000  | 0.88 | 0.93 | 0.90 |
| P04278  | Sex hormone-binding globulin                                     | 8.70E-01 | 323000   | 349000   | 342000   | 321000   | 1.08 | 1.06 | 0.99 |
| Q5V5T9  | Obscurin                                                         | 8.70E-01 | 9920000  | 9270000  | 9500000  | 9450000  | 0.93 | 0.96 | 0.95 |
| O75369  | Filamin-B                                                        | 8.70E-01 | 2370000  | 2220000  | 2380000  | 2190000  | 0.94 | 1.00 | 0.92 |
| Q968Y6  | Dedicator of cytokinesis protein 10                              | 8.70E-01 | 2960000  | 3050000  | 2980000  | 2860000  | 1.03 | 1.01 | 0.97 |
| P35542  | Serum amyloid A-4 protein                                        | 8.70E-01 | 223000   | 231000   | 235000   | 245000   | 1.04 | 1.05 | 1.10 |
| O43290  | U4/U6.U5 tri-snRNP-associated protein 1                          | 8.70E-01 | 608000   | 555000   | 571000   | 549000   | 0.91 | 0.94 | 0.90 |
| P01614  | Ig kappa chain V-II region Cum                                   | 8.70E-01 | 143000   | 157000   | 143000   | 128000   | 1.10 | 1.00 | 0.90 |
| Q8WZA6  | Olfactory receptor 1E3                                           | 8.70E-01 | 102000   | 110000   | 110000   | 101000   | 1.08 | 1.08 | 0.99 |
| P01031  | Complement C5                                                    | 8.80E-01 | 7320000  | 7140000  | 7210000  | 7100000  | 0.98 | 0.98 | 0.97 |
| P00734  | Prothrombin                                                      | 8.80E-01 | 11500000 | 11000000 | 11200000 | 10900000 | 0.96 | 0.97 | 0.95 |
| P01042  | Kininogen-1                                                      | 8.80E-01 | 9600000  | 9170000  | 9460000  | 9390000  | 0.96 | 0.99 | 0.98 |
| P36955  | Pigment epithelium-derived factor                                | 8.80E-01 | 1210000  | 1160000  | 1200000  | 1180000  | 0.96 | 0.99 | 0.98 |
| P63261  | Actin, cytoplasmic 2                                             | 8.80E-01 | 1590000  | 1480000  | 1470000  | 1580000  | 0.93 | 0.92 | 0.99 |
| Q8NCM2  | Potassium voltage-gated channel subfamily H member 5             | 8.80E-01 | 939000   | 959000   | 918000   | 911000   | 1.02 | 0.98 | 0.97 |
| P35443  | Thrombospondin-4                                                 | 8.80E-01 | 2020000  | 1990000  | 2000000  | 2150000  | 0.99 | 0.99 | 1.06 |
| Q9H892  | Tetratricopeptide repeat protein 12                              | 8.80E-01 | 1940000  | 1850000  | 1880000  | 1860000  | 0.95 | 0.97 | 0.96 |
| P13671  | Complement component C6                                          | 8.90E-01 | 3050000  | 2800000  | 2980000  | 2880000  | 0.92 | 0.98 | 0.94 |
| P33151  | Cadherin-5                                                       | 8.90E-01 | 655000   | 653000   | 662000   | 630000   | 1.00 | 1.01 | 0.96 |
| P04083  | Annexin A1                                                       | 8.90E-01 | 1610000  | 1550000  | 1600000  | 1570000  | 0.96 | 0.99 | 0.98 |
| Q9BY43  | Charged multivesicular body protein 4a                           | 8.90E-01 | 294000   | 263000   | 283000   | 286000   | 0.89 | 0.96 | 0.97 |

|        |                                                                 |          |          |          |          |          |      |      |      |
|--------|-----------------------------------------------------------------|----------|----------|----------|----------|----------|------|------|------|
| Q99784 | Noelin                                                          | 8.90E-01 | 781000   | 711000   | 722000   | 694000   | 0.91 | 0.92 | 0.89 |
| Q08380 | Galectin-3-binding protein                                      | 8.90E-01 | 290000   | 243000   | 261000   | 250000   | 0.84 | 0.90 | 0.86 |
| Q9NSB4 | Keratin, type II cuticular Hb2                                  | 8.90E-01 | 54500    | 57100    | 51400    | 53300    | 1.05 | 0.94 | 0.98 |
| Q7Z3D4 | LysM and putative peptidoglycan-binding domain-containing prote | 8.90E-01 | 622000   | 619000   | 638000   | 645000   | 1.00 | 1.03 | 1.04 |
| P00740 | Coagulation factor IX                                           | 9.00E-01 | 414000   | 440000   | 450000   | 434000   | 1.06 | 1.09 | 1.05 |
| P02655 | Apolipoprotein C-II                                             | 9.00E-01 | 505000   | 401000   | 388000   | 456000   | 0.79 | 0.77 | 0.90 |
| Q15582 | Transforming growth factor-beta-induced protein ig-h3           | 9.00E-01 | 847000   | 809000   | 798000   | 762000   | 0.96 | 0.94 | 0.90 |
| P01344 | Insulin-like growth factor II                                   | 9.00E-01 | 65000    | 66000    | 62800    | 60800    | 1.02 | 0.97 | 0.94 |
| Q6PKG0 | La-related protein 1                                            | 9.00E-01 | 1410000  | 1470000  | 1410000  | 1520000  | 1.04 | 1.00 | 1.08 |
| Q16832 | Discoidin domain-containing receptor 2                          | 9.00E-01 | 1530000  | 1400000  | 1450000  | 1440000  | 0.92 | 0.95 | 0.94 |
| Q9H221 | ATP-binding cassette sub-family G member 8                      | 9.00E-01 | 498000   | 505000   | 465000   | 485000   | 1.01 | 0.93 | 0.97 |
| O75197 | Low-density lipoprotein receptor-related protein 5              | 9.00E-01 | 389000   | 358000   | 375000   | 360000   | 0.92 | 0.96 | 0.93 |
| ASA3E0 | POTE ankyrin domain family member F                             | 9.10E-01 | 2950000  | 2920000  | 3100000  | 3020000  | 0.99 | 1.05 | 1.02 |
| Q6ZRO8 | Dynein heavy chain 12, axonemal                                 | 9.10E-01 | 5880000  | 5790000  | 5950000  | 5600000  | 0.98 | 1.01 | 0.95 |
| P11226 | Mannose-binding protein C                                       | 9.10E-01 | 531000   | 460000   | 500000   | 521000   | 0.87 | 0.94 | 0.98 |
| P00451 | Coagulation factor VIII                                         | 9.10E-01 | 6210000  | 6090000  | 6150000  | 6000000  | 0.98 | 0.99 | 0.97 |
| Q9H650 | Probable ATP-dependent RNA helicase YTHDC2                      | 9.10E-01 | 3150000  | 3090000  | 3250000  | 3070000  | 0.98 | 1.03 | 0.97 |
| P07205 | Phosphoglycerate kinase 2                                       | 9.10E-01 | 1230000  | 1280000  | 1260000  | 1210000  | 1.04 | 1.02 | 0.98 |
| P19013 | Keratin, type II cytoskeletal 4                                 | 9.10E-01 | 1590000  | 1520000  | 1540000  | 1590000  | 0.96 | 0.97 | 1.00 |
| Q9P2D3 | HEAT repeat-containing protein 5B                               | 9.10E-01 | 6490000  | 6170000  | 6450000  | 6280000  | 0.95 | 0.99 | 0.97 |
| Q13586 | Stromal interaction molecule 1                                  | 9.10E-01 | 1680000  | 1580000  | 1750000  | 1760000  | 0.94 | 1.04 | 1.05 |
| O75674 | TOM1-like protein 1                                             | 9.10E-01 | 527000   | 500000   | 526000   | 509000   | 0.95 | 1.00 | 0.97 |
| A8MPT4 | Glutathione S-transferase theta-4                               | 9.10E-01 | 980000   | 958000   | 966000   | 941000   | 0.98 | 0.99 | 0.96 |
| Q9H4A6 | Golgi phosphoprotein 3                                          | 9.10E-01 | 401000   | 386000   | 404000   | 414000   | 0.96 | 1.01 | 1.03 |
| P21333 | Filamin-A                                                       | 9.20E-01 | 5850000  | 5740000  | 5820000  | 5680000  | 0.98 | 0.99 | 0.97 |
| P08571 | Monocyte differentiation antigen CD14                           | 9.20E-01 | 232000   | 247000   | 228000   | 234000   | 1.06 | 0.98 | 1.01 |
| P78386 | Keratin, type II cuticular Hb5                                  | 9.20E-01 | 1010000  | 901000   | 1000000  | 989000   | 0.89 | 0.99 | 0.98 |
| O95497 | Pantetheinase                                                   | 9.20E-01 | 376000   | 390000   | 387000   | 366000   | 1.04 | 1.03 | 0.97 |
| P04075 | Fructose-bisphosphate aldolase A                                | 9.20E-01 | 341000   | 318000   | 316000   | 318000   | 0.93 | 0.93 | 0.93 |
| P09486 | SPARC                                                           | 9.20E-01 | 237000   | 234000   | 232000   | 243000   | 0.99 | 0.98 | 1.03 |
| Q96A37 | RING finger protein 166                                         | 9.20E-01 | 1040000  | 1040000  | 1010000  | 1010000  | 1.00 | 0.97 | 0.97 |
| P08603 | Complement factor H                                             | 9.30E-01 | 16200000 | 15500000 | 15600000 | 15700000 | 0.96 | 0.96 | 0.97 |
| P07225 | Vitamin K-dependent protein S                                   | 9.30E-01 | 981000   | 956000   | 945000   | 963000   | 0.97 | 0.96 | 0.98 |
| P80108 | Phosphatidylinositol-glycan-specific phospholipase D            | 9.30E-01 | 448000   | 490000   | 484000   | 463000   | 1.09 | 1.08 | 1.03 |
| P02743 | Serum amyloid P-component                                       | 9.30E-01 | 2920000  | 2780000  | 2780000  | 2780000  | 0.95 | 0.95 | 0.95 |
| Q9Y6R7 | IgGfC-binding protein                                           | 9.30E-01 | 1390000  | 1500000  | 1520000  | 1490000  | 1.08 | 1.09 | 1.07 |
| Q02325 | Plasminogen-like protein B                                      | 9.30E-01 | 482000   | 505000   | 513000   | 525000   | 1.05 | 1.06 | 1.09 |
| P22891 | Vitamin K-dependent protein Z                                   | 9.30E-01 | 39900    | 41300    | 40600    | 37300    | 1.04 | 1.02 | 0.93 |
| P08727 | Keratin, type I cytoskeletal 19                                 | 9.30E-01 | 689000   | 657000   | 679000   | 669000   | 0.95 | 0.99 | 0.97 |
| Q9UIF8 | Bromodomain adjacent to zinc finger domain protein 2B           | 9.30E-01 | 2600000  | 2740000  | 2730000  | 2690000  | 1.05 | 1.05 | 1.03 |
| O00151 | PDZ and LIM domain protein 1                                    | 9.30E-01 | 327000   | 348000   | 352000   | 330000   | 1.06 | 1.08 | 1.01 |
| P22692 | Insulin-like growth factor-binding protein 4                    | 9.30E-01 | 13600    | 14400    | 13300    | 13700    | 1.06 | 0.98 | 1.01 |
| P06276 | Cholinesterase; EC=3.1.1.8                                      | 9.40E-01 | 2370000  | 2370000  | 2420000  | 2270000  | 1.00 | 1.02 | 0.96 |
| P13796 | Plastin-2                                                       | 9.40E-01 | 571000   | 534000   | 534000   | 544000   | 0.94 | 0.94 | 0.95 |
| P51587 | Breast cancer type 2 susceptibility protein                     | 9.40E-01 | 9920000  | 9690000  | 9850000  | 9530000  | 0.98 | 0.99 | 0.96 |
| O00187 | Mannan-binding lectin serine protease 2                         | 9.40E-01 | 1380000  | 1300000  | 1380000  | 1330000  | 0.94 | 1.00 | 0.96 |
| Q9P281 | BAH and coiled-coil domain-containing protein 1                 | 9.40E-01 | 5340000  | 5360000  | 5210000  | 5090000  | 1.00 | 0.98 | 0.95 |
| Q6UXB8 | Peptidase inhibitor 16                                          | 9.40E-01 | 265000   | 281000   | 268000   | 267000   | 1.06 | 1.01 | 1.01 |
| P20851 | C4b-binding protein beta chain                                  | 9.40E-01 | 67800    | 68100    | 69900    | 72700    | 1.00 | 1.03 | 1.07 |
| P00918 | Carbonic anhydrase 2                                            | 9.40E-01 | 854000   | 820000   | 806000   | 822000   | 0.96 | 0.94 | 0.96 |
| Q9Y281 | Cofilin-2                                                       | 9.40E-01 | 652000   | 601000   | 584000   | 605000   | 0.92 | 0.90 | 0.93 |
| P60174 | Triosephosphate isomerase                                       | 9.40E-01 | 218000   | 205000   | 209000   | 210000   | 0.94 | 0.96 | 0.96 |
| P22102 | Trifunctional purine biosynthetic protein adenosine-3           | 9.40E-01 | 1160000  | 1160000  | 1100000  | 1100000  | 1.00 | 0.95 | 0.95 |
| Q13330 | Metastasis-associated protein MTA1;                             | 9.40E-01 | 830000   | 878000   | 887000   | 857000   | 1.06 | 1.07 | 1.03 |
| Q12799 | T-complex protein 10A homolog;                                  | 9.40E-01 | 1660000  | 1720000  | 1740000  | 1650000  | 1.04 | 1.05 | 0.99 |
| Q147U7 | Single-pass membrane and coiled-coil domain-containing protein  | 9.40E-01 | 2480000  | 2250000  | 2320000  | 2180000  | 0.91 | 0.94 | 0.88 |
| Q9NPY3 | Complement component C1q receptor                               | 9.40E-01 | 23600    | 24700    | 23000    | 24800    | 1.05 | 0.97 | 1.05 |
| P19827 | Inter-alpha-trypsin inhibitor heavy chain H1                    | 9.50E-01 | 1350000  | 1320000  | 1310000  | 1300000  | 0.98 | 0.97 | 0.96 |
| P03952 | Plasma kallikrein; EC=3.4.21.34                                 | 9.50E-01 | 2220000  | 2110000  | 2140000  | 2130000  | 0.95 | 0.96 | 0.96 |
| P07357 | Complement component C8 alpha chain                             | 9.50E-01 | 1850000  | 1820000  | 1910000  | 1860000  | 0.98 | 1.03 | 1.01 |
| P18206 | Vinculin                                                        | 9.50E-01 | 942000   | 952000   | 971000   | 973000   | 1.01 | 1.03 | 1.03 |
| Q72794 | Keratin, type II cytoskeletal 1b                                | 9.50E-01 | 1530000  | 1580000  | 1530000  | 1500000  | 1.03 | 1.00 | 0.98 |
| O95678 | Keratin, type II cytoskeletal 75                                | 9.50E-01 | 1030000  | 1030000  | 1000000  | 1010000  | 1.00 | 0.97 | 0.98 |
| O75366 | Advillin                                                        | 9.50E-01 | 640000   | 590000   | 556000   | 588000   | 0.92 | 0.87 | 0.92 |
| Q6NW34 | Uncharacterized protein C3orf17                                 | 9.50E-01 | 627000   | 672000   | 610000   | 598000   | 1.07 | 0.97 | 0.95 |
| P02749 | Beta-2-glycoprotein 1                                           | 9.60E-01 | 1340000  | 1270000  | 1260000  | 1230000  | 0.95 | 0.94 | 0.92 |
| P10909 | Clusterin                                                       | 9.60E-01 | 5140000  | 5220000  | 5300000  | 5270000  | 1.02 | 1.03 | 1.03 |
| P06681 | Complement C2                                                   | 9.60E-01 | 1840000  | 1790000  | 1780000  | 1730000  | 0.97 | 0.97 | 0.94 |
| POCG38 | POTE ankyrin domain family member I                             | 9.60E-01 | 2960000  | 2830000  | 2890000  | 2870000  | 0.96 | 0.98 | 0.97 |
| Q86UX7 | Fermitin family homolog 3                                       | 9.60E-01 | 79600    | 72300    | 77700    | 81400    | 0.91 | 0.98 | 1.02 |
| A4D1E1 | Zinc finger protein 804B                                        | 9.60E-01 | 2290000  | 2300000  | 2330000  | 2180000  | 1.00 | 1.02 | 0.95 |
| P35442 | Thrombospondin-2                                                | 9.60E-01 | 921000   | 908000   | 918000   | 875000   | 0.99 | 1.00 | 0.95 |
| Q5T1M5 | FK506-binding protein 15                                        | 9.60E-01 | 1750000  | 1710000  | 1720000  | 1780000  | 0.98 | 0.98 | 1.02 |
| P01597 | Ig kappa chain V-I region DEE                                   | 9.60E-01 | 35900    | 35100    | 35800    | 33200    | 0.98 | 1.00 | 0.92 |
| Q6EMK4 | Vasorin                                                         | 9.60E-01 | 9240.63  | 8718.72  | 9390.51  | 9654.85  | 0.94 | 1.02 | 1.04 |
| P12955 | Xaa-Pro dipeptidase                                             | 9.60E-01 | 240000   | 217000   | 222000   | 225000   | 0.90 | 0.93 | 0.94 |
| P61160 | Actin-related protein 2                                         | 9.60E-01 | 311000   | 300000   | 302000   | 315000   | 0.96 | 0.97 | 1.01 |
| P30043 | Flavin reductase (NADPH)                                        | 9.60E-01 | 46600    | 48000    | 45500    | 48100    | 1.03 | 0.98 | 1.03 |
| Q9BTU6 | Phosphatidylinositol 4-kinase type 2-alpha                      | 9.60E-01 | 116000   | 109000   | 115000   | 117000   | 0.94 | 0.99 | 1.01 |
| P03950 | Angiogenin                                                      | 9.60E-01 | 8368.09  | 7940.01  | 7868.98  | 7822.79  | 0.95 | 0.94 | 0.93 |
| Q8NBT3 | Transmembrane protein 145                                       | 9.60E-01 | 38700    | 38100    | 37700    | 37200    | 0.98 | 0.97 | 0.96 |
| P05546 | Heparin cofactor 2                                              | 9.70E-01 | 1960000  | 1890000  | 1890000  | 1910000  | 0.96 | 0.96 | 0.97 |
| P25311 | Zinc-alpha-2-glycoprotein-                                      | 9.70E-01 | 4150000  | 4050000  | 4130000  | 3960000  | 1.00 | 0.95 | 0.95 |

|        |                                                                    |          |          |          |          |          |      |      |      |
|--------|--------------------------------------------------------------------|----------|----------|----------|----------|----------|------|------|------|
| Q96PD5 | N-acetylmuramoyl-L-alanine amidase                                 | 9.70E-01 | 1540000  | 1540000  | 1520000  | 1480000  | 1.00 | 0.99 | 0.96 |
| P05155 | Plasma protease C1 inhibitor                                       | 9.70E-01 | 2130000  | 2020000  | 2020000  | 2100000  | 0.95 | 0.95 | 0.99 |
| P05452 | Tetranectin                                                        | 9.70E-01 | 789000   | 780000   | 788000   | 815000   | 0.99 | 1.00 | 1.03 |
| Q16610 | Extracellular matrix protein 1                                     | 9.70E-01 | 950000   | 921000   | 925000   | 913000   | 0.97 | 0.97 | 0.96 |
| Q96KN2 | Beta-Ala-His dipeptidase                                           | 9.70E-01 | 638000   | 610000   | 614000   | 616000   | 0.96 | 0.96 | 0.97 |
| P02747 | Complement C1q subcomponent subunit C                              | 9.70E-01 | 1260000  | 1200000  | 1240000  | 1230000  | 0.95 | 0.98 | 0.98 |
| P67936 | Tropomyosin alpha-4 chain                                          | 9.70E-01 | 398000   | 383000   | 385000   | 383000   | 0.96 | 0.97 | 0.96 |
| Q9UBT6 | DNA polymerase kappa                                               | 9.70E-01 | 2330000  | 2320000  | 2300000  | 2370000  | 1.00 | 0.99 | 1.02 |
| P32119 | Peroxiredoxin-2                                                    | 9.70E-01 | 35600    | 34300    | 32900    | 34200    | 0.96 | 0.92 | 0.96 |
| Q13496 | Myotubularin                                                       | 9.70E-01 | 1190000  | 1150000  | 1200000  | 1150000  | 0.97 | 1.01 | 0.97 |
| Q8WZ75 | Roundabout homolog 4                                               | 9.70E-01 | 1050000  | 1080000  | 1110000  | 1030000  | 1.03 | 1.06 | 0.98 |
| Q5VZB9 | Doublesex- and mab-3-related transcription factor A1               | 9.70E-01 | 71500    | 68500    | 67700    | 67600    | 0.96 | 0.95 | 0.95 |
| Q9BV40 | Vesicle-associated membrane protein 8                              | 9.70E-01 | 511000   | 464000   | 474000   | 456000   | 0.91 | 0.93 | 0.89 |
| P00747 | Plasminogen                                                        | 9.80E-01 | 14500000 | 13900000 | 14200000 | 14000000 | 0.96 | 0.98 | 0.97 |
| P02774 | Vitamin D-binding protein                                          | 9.80E-01 | 23700000 | 22900000 | 23800000 | 23200000 | 0.97 | 1.00 | 0.98 |
| P02675 | Fibrinogen beta chain                                              | 9.80E-01 | 3070000  | 2980000  | 2980000  | 2870000  | 0.97 | 0.97 | 0.93 |
| P01023 | Alpha-2-macroglobulin                                              | 9.80E-01 | 935000   | 917000   | 917000   | 875000   | 0.98 | 0.98 | 0.94 |
| Q6S8J3 | POTE ankyrin domain family member E                                | 9.80E-01 | 2880000  | 2800000  | 2870000  | 2890000  | 0.97 | 1.00 | 1.00 |
| Q9UGM5 | Fetuin-B                                                           | 9.80E-01 | 393000   | 382000   | 386000   | 392000   | 0.97 | 0.98 | 1.00 |
| P04070 | Vitamin K-dependent protein C                                      | 9.80E-01 | 630000   | 647000   | 652000   | 625000   | 1.03 | 1.03 | 0.99 |
| P49908 | Selenoprotein P                                                    | 9.80E-01 | 271000   | 268000   | 266000   | 264000   | 0.99 | 0.98 | 0.97 |
| P49747 | Cartilage oligomeric matrix protein                                | 9.80E-01 | 295000   | 284000   | 293000   | 278000   | 0.96 | 0.99 | 0.94 |
| P22105 | Tenascin-X                                                         | 9.80E-01 | 1770000  | 1740000  | 1780000  | 1750000  | 0.98 | 1.01 | 0.99 |
| P02533 | Keratin, type I cytoskeletal 14                                    | 9.80E-01 | 509000   | 506000   | 487000   | 503000   | 0.99 | 0.96 | 0.99 |
| P13646 | Keratin, type I cytoskeletal 13                                    | 9.80E-01 | 458000   | 441000   | 450000   | 457000   | 0.96 | 0.98 | 1.00 |
| Q9NPH3 | Interleukin-1 receptor accessory protein                           | 9.80E-01 | 1200000  | 1170000  | 1160000  | 1170000  | 0.98 | 0.97 | 0.98 |
| Q8TF30 | WASP homolog-associated protein with actin, membranes and mic      | 9.80E-01 | 2070000  | 2130000  | 2110000  | 2060000  | 1.03 | 1.02 | 1.00 |
| Q15113 | Procollagen C-endopeptidase enhancer 1                             | 9.80E-01 | 96800    | 92300    | 94100    | 96800    | 0.95 | 0.97 | 1.00 |
| P33981 | Dual specificity protein kinase TTK                                | 9.80E-01 | 1860000  | 1870000  | 1810000  | 1870000  | 1.01 | 0.97 | 1.01 |
| Q9NZR1 | Tropomodulin-2                                                     | 9.80E-01 | 1750000  | 1680000  | 1730000  | 1660000  | 0.96 | 0.99 | 0.95 |
| O75717 | WD repeat and HMG-box DNA-binding protein 1                        | 9.80E-01 | 6490000  | 6200000  | 6370000  | 6230000  | 0.96 | 0.98 | 0.96 |
| P18887 | DNA repair protein XRCC1                                           | 9.80E-01 | 787000   | 752000   | 776000   | 759000   | 0.96 | 0.99 | 0.96 |
| P24593 | Insulin-like growth factor-binding protein 5                       | 9.80E-01 | 638000   | 618000   | 618000   | 611000   | 0.97 | 0.97 | 0.96 |
| Q8NCN5 | Pyruvate dehydrogenase phosphatase regulatory subunit, mitoch      | 9.80E-01 | 216000   | 218000   | 229000   | 190000   | 1.01 | 1.06 | 0.88 |
| P30041 | Peroxiredoxin-6 spot 12                                            | 9.80E-01 | 6671.64  | 6623.73  | 5851.12  | 6251.84  | 0.99 | 0.88 | 0.94 |
| Q14624 | Inter-alpha-trypsin inhibitor heavy chain H4                       | 9.90E-01 | 11100000 | 10800000 | 10900000 | 10900000 | 0.97 | 0.98 | 0.98 |
| P00751 | Complement factor B                                                | 9.90E-01 | 18200000 | 17400000 | 17800000 | 17600000 | 0.96 | 0.98 | 0.97 |
| P02748 | Complement component C9                                            | 9.90E-01 | 2680000  | 2640000  | 2740000  | 2660000  | 0.99 | 1.02 | 0.99 |
| P01024 | Complement C3                                                      | 9.90E-01 | 7180000  | 7130000  | 7240000  | 7070000  | 0.99 | 1.01 | 0.98 |
| P07358 | Complement component C8 beta chain                                 | 9.90E-01 | 1840000  | 1810000  | 1830000  | 1760000  | 0.98 | 0.99 | 0.96 |
| P05156 | Complement factor I                                                | 9.90E-01 | 2160000  | 2140000  | 2180000  | 2120000  | 0.99 | 1.01 | 0.98 |
| P08697 | Alpha-2-antiplasmin                                                | 9.90E-01 | 3470000  | 3400000  | 3440000  | 3450000  | 0.98 | 0.99 | 0.99 |
| Q06033 | Inter-alpha-trypsin inhibitor heavy chain H3                       | 9.90E-01 | 4660000  | 4600000  | 4710000  | 4600000  | 0.99 | 1.01 | 0.99 |
| P35858 | Insulin-like growth factor-binding protein complex acid labile sub | 9.90E-01 | 1110000  | 1080000  | 1090000  | 1070000  | 0.97 | 0.98 | 0.96 |
| P20742 | Pregnancy zone protein                                             | 9.90E-01 | 2600000  | 2540000  | 2520000  | 2480000  | 0.98 | 0.97 | 0.95 |
| P22792 | Carboxypeptidase N subunit 2                                       | 9.90E-01 | 1690000  | 1700000  | 1740000  | 1720000  | 1.01 | 1.03 | 1.02 |
| P13645 | Keratin, type I cytoskeletal 10                                    | 9.90E-01 | 1990000  | 2000000  | 1920000  | 2020000  | 1.01 | 0.96 | 1.02 |
| P00488 | Coagulation factor XIII A chain                                    | 9.90E-01 | 1340000  | 1350000  | 1290000  | 1310000  | 1.01 | 0.96 | 0.98 |
| Q961Y4 | Carboxypeptidase B2                                                | 9.90E-01 | 374000   | 373000   | 367000   | 377000   | 1.00 | 0.98 | 1.01 |
| P43251 | Biotinidase                                                        | 9.90E-01 | 402000   | 401000   | 393000   | 389000   | 1.00 | 0.98 | 0.97 |
| P02652 | Apolipoprotein A-II                                                | 9.90E-01 | 315000   | 412000   | 433000   | 381000   | 1.31 | 1.37 | 1.21 |
| P48740 | Mannan-binding lectin serine protease 1                            | 9.90E-01 | 1050000  | 1010000  | 1030000  | 1010000  | 0.96 | 0.98 | 0.96 |
| P35527 | Keratin, type I cytoskeletal 9                                     | 9.90E-01 | 1390000  | 1380000  | 1420000  | 1360000  | 0.99 | 1.02 | 0.98 |
| P27918 | Properdin                                                          | 9.90E-01 | 238000   | 239000   | 245000   | 243000   | 1.00 | 1.03 | 1.02 |
| P22352 | Glutathione peroxidase 3                                           | 9.90E-01 | 174000   | 177000   | 176000   | 177000   | 1.02 | 1.01 | 1.02 |
| P08519 | Apolipoprotein(a)                                                  | 9.90E-01 | 145000   | 144000   | 136000   | 143000   | 0.99 | 0.94 | 0.99 |
| Q6KC79 | Nipped-B-like protein                                              | 9.90E-01 | 3920000  | 3920000  | 3920000  | 3830000  | 1.00 | 1.00 | 0.98 |
| P04275 | von Willebrand factor                                              | 9.90E-01 | 2530000  | 2460000  | 2430000  | 2470000  | 0.97 | 0.96 | 0.98 |
| O75912 | Diacylglycerol kinase iota                                         | 9.90E-01 | 1050000  | 1040000  | 1060000  | 1050000  | 0.99 | 1.01 | 1.00 |
| Q01546 | Keratin, type II cytoskeletal 2 oral                               | 9.90E-01 | 923000   | 911000   | 911000   | 933000   | 0.99 | 0.99 | 1.01 |
| O14786 | Neuropilin-1                                                       | 9.90E-01 | 1360000  | 1300000  | 1320000  | 1310000  | 0.96 | 0.97 | 0.96 |
| P05787 | Keratin, type II cytoskeletal 8                                    | 9.90E-01 | 2100000  | 2190000  | 2120000  | 2120000  | 1.04 | 1.01 | 1.01 |
| Q15233 | Non-POU domain-containing octamer-binding protein                  | 9.90E-01 | 1380000  | 1360000  | 1390000  | 1390000  | 0.99 | 1.01 | 1.01 |
| Q5H8C1 | FRAS1-related extracellular matrix protein 1                       | 9.90E-01 | 2290000  | 2330000  | 2360000  | 2320000  | 1.02 | 1.03 | 1.01 |
| P58107 | Epiplakin                                                          | 9.90E-01 | 3380000  | 3250000  | 3340000  | 3350000  | 0.96 | 0.99 | 0.99 |
| Q9BWP8 | Collectin-11                                                       | 9.90E-01 | 868000   | 860000   | 888000   | 837000   | 0.99 | 1.02 | 0.96 |
| Q722Q7 | Leucine-rich repeat-containing protein 70                          | 9.90E-01 | 676000   | 677000   | 668000   | 650000   | 1.00 | 0.99 | 0.96 |
| Q96124 | Far upstream element-binding protein 3                             | 9.90E-01 | 1570000  | 1590000  | 1520000  | 1500000  | 1.01 | 0.97 | 0.96 |
| O14917 | Protocadherin-17                                                   | 9.90E-01 | 2100000  | 1960000  | 2000000  | 1960000  | 0.93 | 0.95 | 0.93 |
| P00450 | Ceruloplasmin                                                      | 1.00E+00 | 29400000 | 29400000 | 29100000 | 28000000 | 1.00 | 0.99 | 0.95 |
| P06727 | Apolipoprotein A-IV                                                | 1.00E+00 | 14100000 | 13400000 | 13600000 | 14000000 | 0.95 | 0.96 | 0.99 |
| P43652 | Afamin                                                             | 1.00E+00 | 5210000  | 4830000  | 5120000  | 5100000  | 0.93 | 0.98 | 0.98 |
| P10643 | Complement component C7                                            | 1.00E+00 | 1400000  | 1360000  | 1390000  | 1380000  | 0.97 | 0.99 | 0.99 |
| P01019 | Angiotensinogen                                                    | 1.00E+00 | 2180000  | 2190000  | 2170000  | 2070000  | 1.00 | 1.00 | 0.95 |
| P04196 | Histidine-rich glycoprotein                                        | 1.00E+00 | 1220000  | 1180000  | 1200000  | 1180000  | 0.97 | 0.98 | 0.97 |
| P05543 | Thyroxine-binding globulin                                         | 1.00E+00 | 745000   | 712000   | 729000   | 713000   | 0.96 | 0.98 | 0.96 |
| P51884 | Lumican                                                            | 1.00E+00 | 2300000  | 2250000  | 2280000  | 2400000  | 0.98 | 0.99 | 1.04 |
| P02750 | Leucine-rich alpha-2-glycoprotein                                  | 1.00E+00 | 1060000  | 1070000  | 1120000  | 1060000  | 1.01 | 1.06 | 1.00 |
| P08185 | Corticosteroid-binding globulin                                    | 1.00E+00 | 852000   | 841000   | 872000   | 821000   | 0.99 | 1.02 | 0.96 |
| Q14520 | Hyaluronan-binding protein 2                                       | 1.00E+00 | 1010000  | 1000000  | 1010000  | 997000   | 0.99 | 1.00 | 0.99 |
| P02741 | C-reactive protein                                                 | 1.00E+00 | 205000   | 202000   | 209000   | 205000   | 0.99 | 1.02 | 1.00 |
| Q15848 | Adiponectin                                                        | 1.00E+00 | 65900    | 68200    | 64800    | 64900    | 1.03 | 0.98 | 0.98 |
| P16070 | CD44 antigen                                                       | 1.00E+00 | 2540000  | 2510000  | 2530000  | 2490000  | 0.99 | 1.00 | 0.98 |
| P06733 | Alpha-enolase                                                      | 1.00E+00 | 672000   | 659000   | 667000   | 654000   | 0.98 | 0.99 | 0.97 |
| Q14999 | Cullin-7                                                           | 1.00E+00 | 881000   | 872000   | 864000   | 870000   | 0.99 | 0.98 | 0.99 |
| Q9Y666 | Solute carrier family 12 member 7                                  | 1.00E+00 | 1400000  | 1380000  | 1360000  | 1400000  | 0.99 | 0.97 | 1.00 |
| P62158 | Calmodulin                                                         | 1.00E+00 | 185000   | 185000   | 185000   | 190000   | 1.00 | 1.00 | 1.03 |
| Q86VB7 | Scavenger receptor cysteine-rich type 1 protein M130               | 1.00E+00 | 2130000  | 2170000  | 2200000  | 2140000  | 1.02 | 1.03 | 1.00 |
| P57789 | Potassium channel subfamily K member 10                            | 1.00E+00 | 793000   | 735000   | 726000   | 742000   | 0.93 | 0.92 | 0.94 |
| O14717 | tRNA (cytosine(38)-C(5))-methyltransferase                         | 1.00E+00 | 729000   | 757000   | 729000   | 736000   | 1.04 | 1.00 | 1.01 |
| O95721 | Synaptosomal-associated protein 29                                 | 1.00E+00 | 371000   | 383000   | 395000   | 394000   | 1.03 | 1.06 | 1.06 |

Figure S1

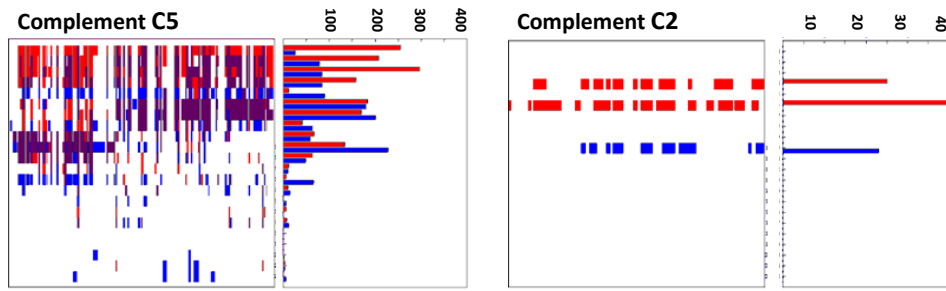



Figure S2

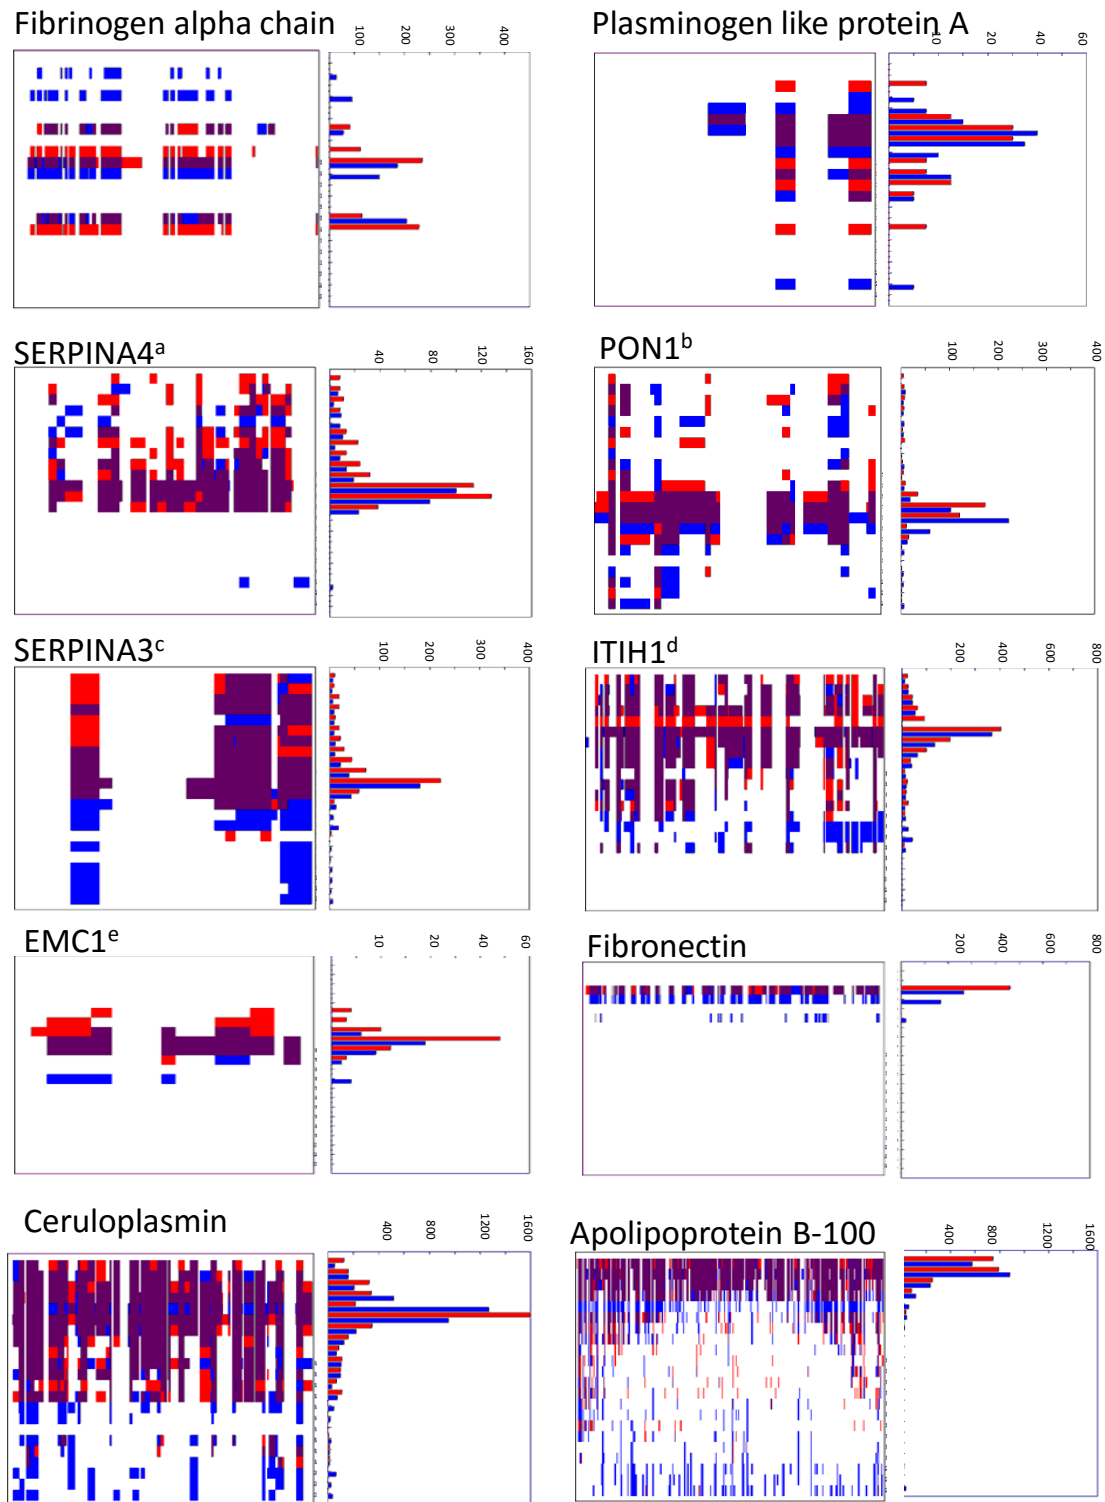

<sup>a</sup>Corticosteroid-binding globulin, <sup>b</sup>Serum paraoxonase, <sup>c</sup>Alpha-1 antichymotrypsin, <sup>d</sup>Inter alpha trypsin inhibitor, <sup>e</sup> Extracellular matrix protein-1
